# Supplementary material for: Light enhanced energy storage ability through a hybrid plasmonic Ag nanowire decorated hydroxide “skin structure”
Source: Royal Society of Chemistry journal article supplement (doi:10.1039/c7nr04006g), 2017-01-01
Supplement: c7nr04006g1.pdf [file c7nr04006g1.pdf]

## Supporting Information

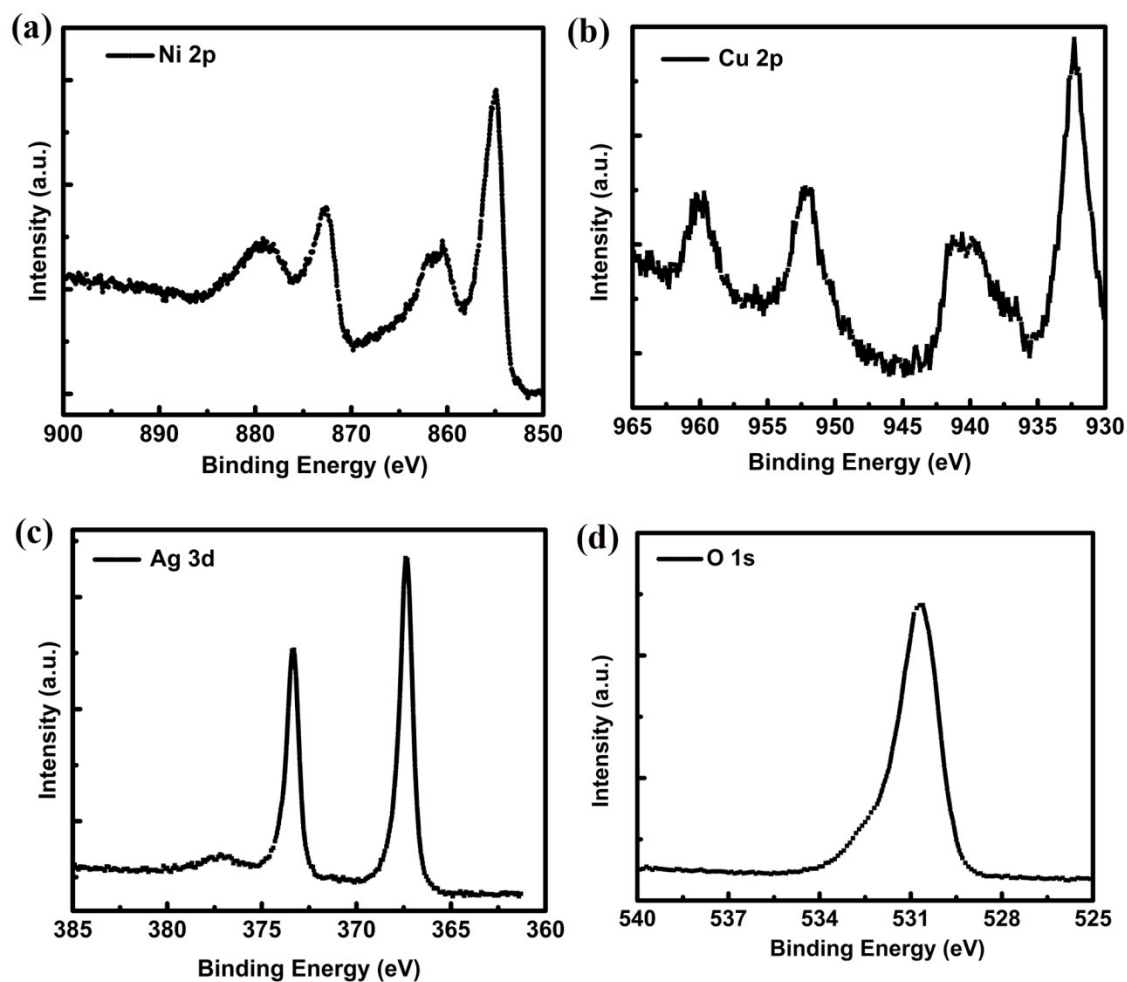

Figure S1 XPS spectra of the hybrid Ag@NCH (a) Ni 2p; (b) Cu 2p; (c) Ag 3d; (d) O 1s

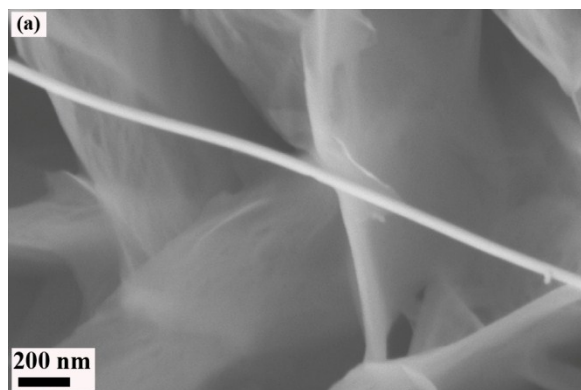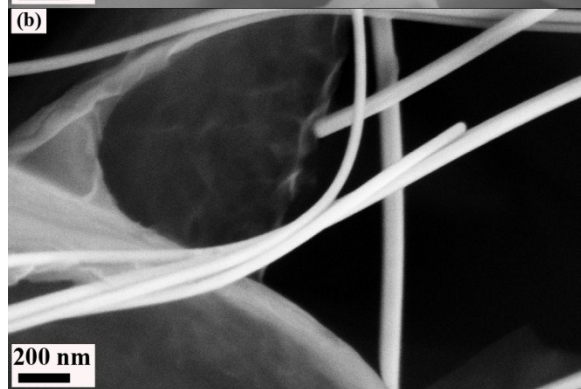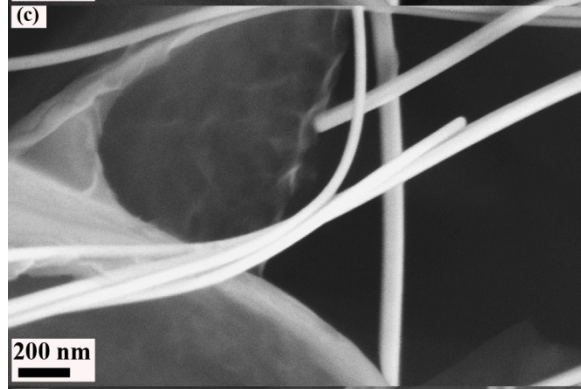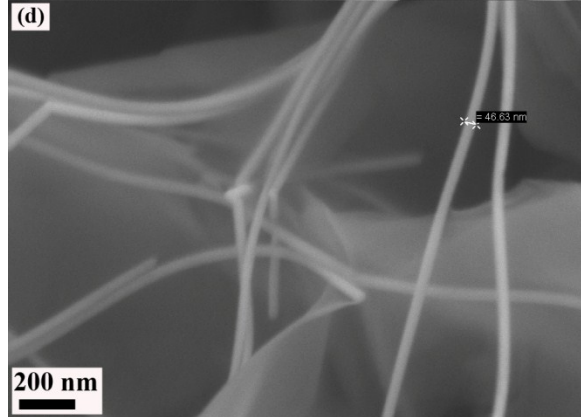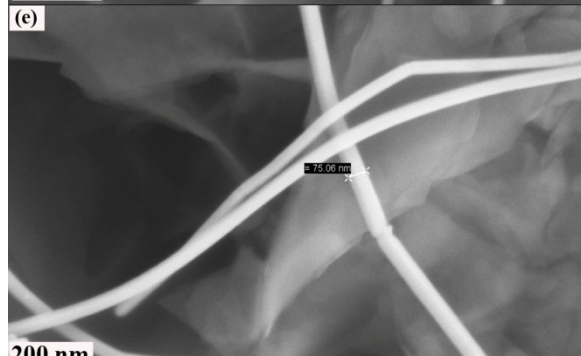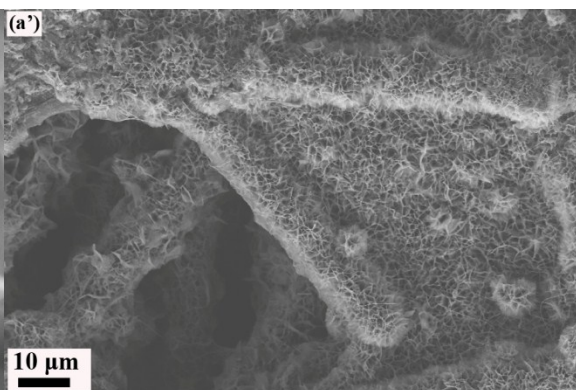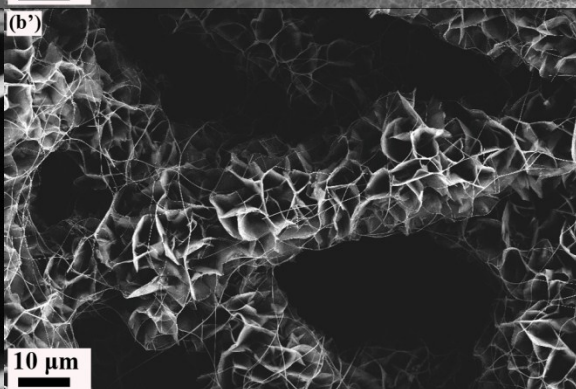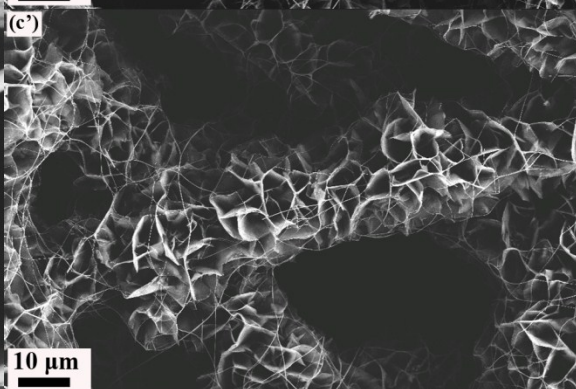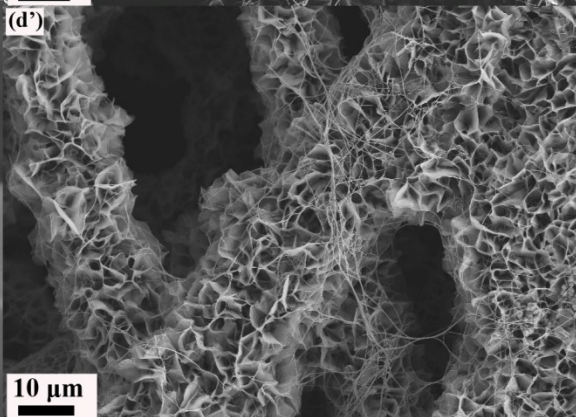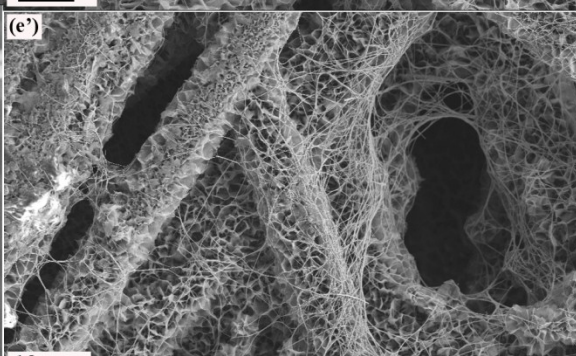

**Figure S2 SEM images of all the samples with different loading amounts of Ag on top of NCH**

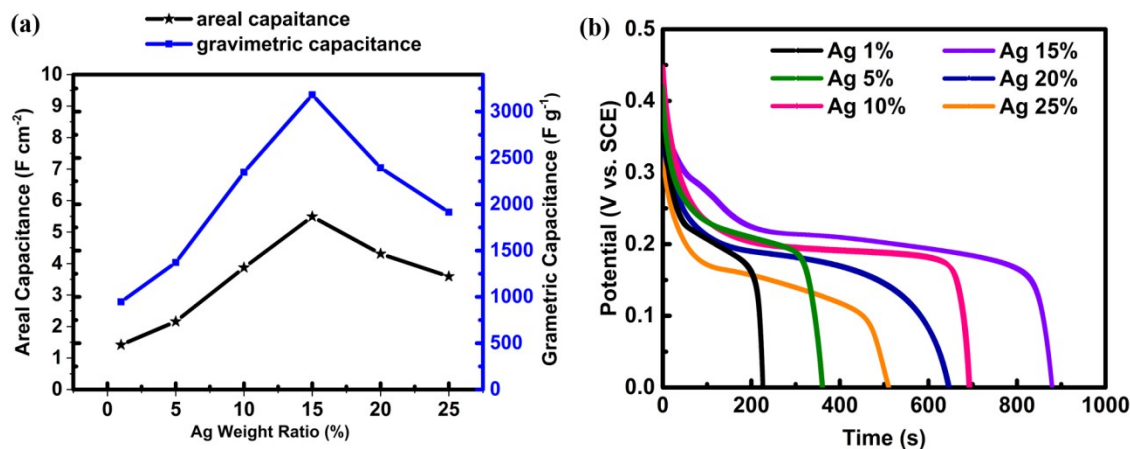

**Figure S3 (a) Comparison of areal capacitances and gravimetric capacitances of samples with different loading amounts of silver nanowires (b) Discharge profiles of samples with different loading amounts of silver nanowires, ranging from 1% to 25%**

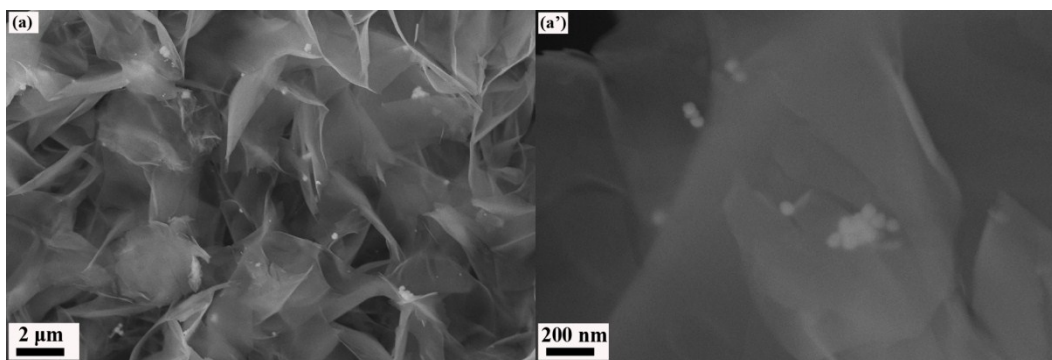

**Figure S4 (a and a') SEM images of silver nanoparticles (Ag NPs) decorated NCH**

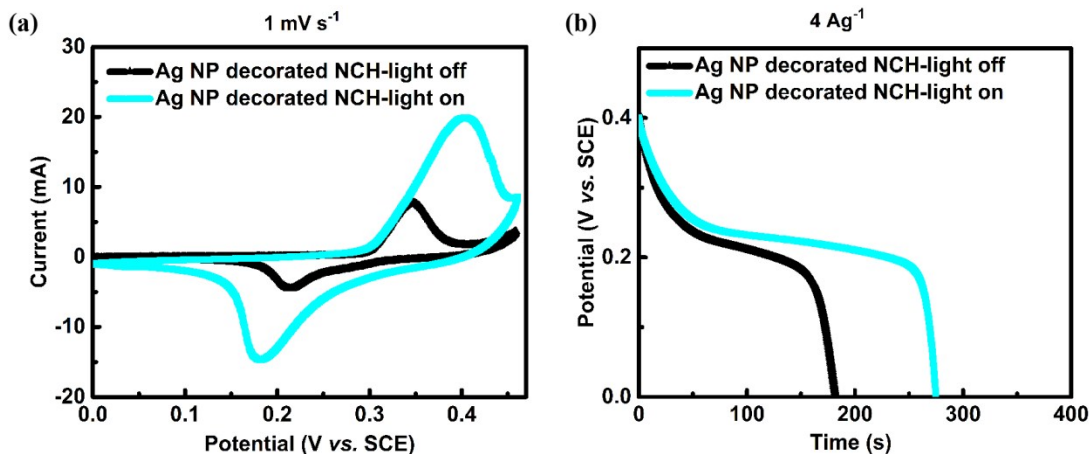

**Figure S5 CV curves (a) and CD curves (b) of silver nanoparticles (Ag NPs) decorated NCH with or without light illumination**
